# Supplementary material for: Healing double vacancy defects on graphene: reconstruction by C2adsorption
Source: Royal Society of Chemistry journal article supplement (doi:10.1039/d2cp05233d), 2023-01-01
Supplement: d2cp05233d1.pdf [file d2cp05233d1.pdf]

## Supporting Information

### Healing Double Vacancy Defects on Graphene. Reconstruction by C<sub>2</sub> Adsorption.

Parisa Alamdari<sup>1</sup>, Farhad Sharif<sup>1\*</sup>, Saeedeh Mazinani<sup>2</sup>, German Sastre<sup>3\*</sup>, Hermenegildo Garcia<sup>3</sup>

<sup>1</sup> Department of Polymer Engineering and Color Technology, Amirkabir University of Technology, Tehran, Iran.

<sup>2</sup> New Technologies Research Center (NTRC), Amirkabir University of Technology, Tehran, Iran.

<sup>3</sup> Instituto de Tecnología Química, Consejo Superior de Investigaciones Científicas–Universidad Politécnica de Valencia (CSIC-UPV), Avenida de los Naranjos s/n, Valencia 46022, Spain.

### Effect of size of graphene unit cell.

To be sure that 4×4 supercells are large enough to prevent the interaction between cells, the formation energy of double carbon vacancy defects in 4×4 and 6×6 supercells were calculated and compared, not only with each other but also with those reported in literature for different size supercells. There are various methods in the literature for the calculation of vacancy formation energy. If the vacancy formation energy is defined as an average energy per vacant carbon atom in defected graphene structures, then the formation energy per vacant C atom,  $E_f$  for each configuration can be calculated from Equation SI-1:

$$E_f = \frac{1}{n} (E_{v_n} - \frac{N-n}{N} E_{gra}) \quad \text{Equation SI-1}$$

in which  $n$  is the number of vacant carbon atoms in the supercell,  $E_{v_n}$  is the total energy of defected graphene,  $N$  is the number of carbon atoms in the supercell, and  $E_{gra}$  is the total energy of defect free graphene supercell with the same size.

From Equation 1, the formation energy of DV in 4×4 and 6×6 supercells were calculated to be 3.88 and 3.94 eV, respectively in good agreement with the literature, ranging from 3.18 to 4.49 eV (S. T. Skowron, I. V. Lebedeva, A. M. Popov and E. Bichoutskaia, Chemical Society Reviews, 2015, 44, 3143-3176).

It should be noted that in order to correctly compare DV formation energies reported in literature, it is important to consider the differences in definitions of formation energy. In some cases, the defect formation energy is defined by Equation SI-2:

$$E_f = (E_{v_n} + n\mu - E_{gra}) \quad \text{Equation SI-2}$$

in which  $\mu$  is the chemical potential, calculated by dividing the total energy of defect free graphene supercell by the number of atoms in the supercell. Indeed, by rearrangement of Equation SI-2, using Equation SI-1, the difference between the two definitions will be  $\frac{1}{n}$  coefficient of Equation SI-1.

Furthermore, considering NEB (nudged elastic band), used in this study for barrier energy calculations, which are computationally expensive, using supercells larger than 4×4 was not affordable.

### Differences between chemisorption and physisorption processes.

The chemical bond formation has been considered as the main criteria to clarify between physisorption and chemisorption.

When the reactant approaches the graphene surface, physisorption occurs. This leads to  $C_{\text{graph}}-H_{\text{hydrocarbon}}$  distances of ca. 3 Å, and adsorption energies of ca. -100 kJ/mol.

Upon further approach to the graphene surface the latter is reconstructed through formation of  $C_{\text{graph}}-C_{\text{hydrocarbon}}$  bonds whose distances are ca. 1.5 Å, and adsorption energies are -200 kJ/mol or stronger.

Physisorption to chemisorption process goes always from subfigures a→c (Figures 3 and 4 for ethylene, Figures 6 and 7 for acetylene).

Adsorption energies and  $C_{\text{graph}}-C_{\text{hydrocarbon}}$  distances

| <b>Ethylene adsorption</b>  | <b>Orientation</b> | <b><math>C_{\text{graph}}-C_{\text{hydrocarbon}}</math><br/>d(G1/E1) (Å)</b> | <b>Adsorption energy<br/>(kJ/mol)</b> | <b>Figure</b>  |
|-----------------------------|--------------------|------------------------------------------------------------------------------|---------------------------------------|----------------|
| <b>Physisorption</b>        | DVH                | 3.08                                                                         | -93.6                                 | 3 <sup>a</sup> |
|                             | DVP                | 3.57                                                                         | -91.9                                 | 4 <sup>a</sup> |
| <b>Chemisorption</b>        | DVH                | 1.57                                                                         | -199.8                                | 3c             |
|                             | DVP                | 1.51                                                                         | -275.0                                | 4c             |
| <b>Acetylene adsorption</b> | <b>Orientation</b> | <b><math>C_{\text{graph}}-C_{\text{hydrocarbon}}</math><br/>d(G1/A1) (Å)</b> | <b>Adsorption energy<br/>(kJ/mol)</b> | <b>Figure</b>  |
| <b>Physisorption</b>        | DVH                | 3.22                                                                         | -90.8                                 | 6a             |
|                             | DVP                | 3.40                                                                         | -88.1                                 | 7a             |
| <b>Chemisorption</b>        | DVH                | 1.51                                                                         | -933.2                                | 6c             |
|                             | DVP                | 1.46                                                                         | -381.3                                | 7c             |

### Isomorphic substitution of carbon atom in DV graphene.

There are four distinct position around DV for carbon substitution with nitrogen, whose influence on the interaction of carbon dimers with DV could not be neglected. Before studying the carbon dimer interaction with doped DV structures, the total energy and stability of these four configurations were carefully calculated and compared.

Different positions around DV for carbon substitution with nitrogen

|                                                                                   |                                                                                   |                                                                                    |                                                                                     |
|-----------------------------------------------------------------------------------|-----------------------------------------------------------------------------------|------------------------------------------------------------------------------------|-------------------------------------------------------------------------------------|
| 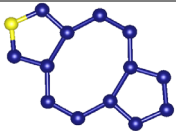 |  |  |  |
| 0                                                                                 | 28.8                                                                              | 38.3                                                                               | 94.4                                                                                |
| N <sub>G1</sub>                                                                   | N <sub>G2</sub>                                                                   | N <sub>P</sub>                                                                     | N <sub>G3</sub>                                                                     |
| Graphitic N in 1                                                                  | Graphitic N in 2                                                                  | Pyridinic N                                                                        | Graphitic N in 3                                                                    |

**Table S1.** Geometries corresponding to the interaction of Ethylene with DV through DVH mechanism.

| Ethylene-DVH                                                                             |                                                   |                                  |                 |                                |      |      |      |      |      |      |      |
|------------------------------------------------------------------------------------------|---------------------------------------------------|----------------------------------|-----------------|--------------------------------|------|------|------|------|------|------|------|
| X axis                                                                                   | Note                                              | Distance in initial geometry (Å) | Y axis          | Distance in final geometry (Å) |      |      |      |      |      |      |      |
| Ethylene chemisorption - NEB calculation                                                 |                                                   |                                  |                 |                                |      |      |      |      |      |      |      |
| -                                                                                        |                                                   |                                  | Energy (kJ/mol) | E1G1                           | E2G3 | E1G2 | E2G4 | G1G2 | G3G4 | E1H2 | G2H2 |
| -                                                                                        | No interaction                                    | Far                              | 0               | -                              | -    | -    | -    | -    | -    | -    | -    |
| 1                                                                                        | Physisorption (full opt, local min)               |                                  | -93.6           | 3.08                           | 3.16 | 3.28 | 3.33 | 1.79 | 1.79 | 1.10 | 2.88 |
| 2                                                                                        | TS1 <sub>NEB</sub> (energy barrier = 56.9 kJ/mol) |                                  | -36.6           | 2.20                           | 2.28 | 2.86 | 2.87 | 1.92 | 1.90 | 1.10 | 2.47 |
| 3                                                                                        | Chemisorption (full opt, local min)               |                                  | -199.8          | 1.57                           | 1.57 | 2.71 | 2.71 | 2.10 | 2.11 | 1.10 | 2.49 |
| First C-C bond formation - E1-G2 distance is constrained (except in full optimizations)  |                                                   |                                  |                 |                                |      |      |      |      |      |      |      |
| -                                                                                        |                                                   | E1G2                             | Energy (kJ/mol) | E1G1                           | E2G3 | E1G2 | E2G4 | G1G2 | G3G4 | E1H2 | G2H2 |
| 3                                                                                        | Chemisorption (full opt, local min)               | 2.7                              | -199.8          | 1.57                           | 1.57 | 2.71 | 2.71 | 2.10 | 2.11 | 1.10 | 2.49 |
| 4                                                                                        |                                                   | 2.6                              | -196.6          | 1.56                           | 1.57 | 2.59 | 2.69 | 2.05 | 2.11 | 1.10 | 2.36 |
| 5                                                                                        |                                                   | 2.4                              | -173.5          | 1.56                           | 1.57 | 2.38 | 2.65 | 1.90 | 2.07 | 1.10 | 2.15 |
| 6                                                                                        |                                                   | 2.2                              | -125.2          | 1.56                           | 1.57 | 2.17 | 2.63 | 1.80 | 2.05 | 1.10 | 1.96 |
| 7                                                                                        | TS2 (energy barrier = 126.4 kJ/mol)               | 2                                | -73.4           | 1.58                           | 1.57 | 2.01 | 2.64 | 1.82 | 2.07 | 1.10 | 1.79 |
| -                                                                                        |                                                   | 1.9                              | -299.3          | 1.48                           | 1.54 | 1.91 | 2.62 | 2.74 | 2.39 | 2.26 | 1.12 |
| 8                                                                                        | Local min (full opt of E1G2=1.9)                  | 1.6                              | -367.5          | 1.51                           | 1.54 | 1.58 | 2.56 | 2.60 | 2.44 | 2.10 | 1.12 |
| Second C-C bond formation - E2-G4 distance is constrained (except in full optimizations) |                                                   |                                  |                 |                                |      |      |      |      |      |      |      |
|                                                                                          |                                                   | E2G4/                            | Energy (kJ/mol) | E1G1                           | E2G3 | E1G2 | E2G4 | G1G2 | G3G4 | E2H4 | G4H4 |
| 8                                                                                        | Local min (full opt of E1G2=1.6)                  | 2.6                              | -367.5          | 1.51                           | 1.54 | 1.58 | 2.56 | 2.60 | 2.44 | 1.10 | 2.28 |
| 9                                                                                        |                                                   | 2.4                              | -358.9          | 1.52                           | 1.54 | 1.57 | 2.38 | 2.59 | 2.36 | 1.11 | 2.08 |
| 10                                                                                       | TS3 (energy barrier = 38.0 kJ/mol)                | 2.2                              | -337.5          | 1.52                           | 1.53 | 1.56 | 2.22 | 2.59 | 2.35 | 1.11 | 1.90 |
| 11                                                                                       |                                                   | 2                                | -510.5          | 1.51                           | 1.48 | 1.58 | 2.01 | 2.63 | 2.83 | 2.37 | 1.11 |
| -                                                                                        |                                                   | 1.8                              | -583.3          | 1.52                           | 1.50 | 1.57 | 1.80 | 2.62 | 2.73 | 2.27 | 1.12 |
| 12                                                                                       | Healed DV (Full opt of E2G4=1.8)                  | 1.56                             | -632.1          | 1.52                           | 1.52 | 1.56 | 1.56 | 2.61 | 2.61 | 2.13 | 1.12 |

**Table S2.** Geometries corresponding to the interaction of Ethylene with DV through DVP mechanism.

| Ethylene-DVP                                                                            |                                                    |                                  |                 |                                 |      |      |      |      |      |      |      |
|-----------------------------------------------------------------------------------------|----------------------------------------------------|----------------------------------|-----------------|---------------------------------|------|------|------|------|------|------|------|
| X axis                                                                                  | Note                                               | Distance in initial geometry (Å) | Y axis          | Distances in final geometry (Å) |      |      |      |      |      |      |      |
| Ethylene chemisorption - NEB calculation                                                |                                                    |                                  |                 |                                 |      |      |      |      |      |      |      |
| -                                                                                       |                                                    |                                  | Energy (kJ/mol) | E1G1                            | E2G2 | E1G3 | E2G4 | G3G4 | G3H3 | G4H4 | E1E2 |
| -                                                                                       | No interaction                                     | Far                              | 0               | -                               | -    | -    | -    | -    | -    | -    | -    |
| 1                                                                                       | Physisorption (full opt, local min)                |                                  | -91.9           | 3.57                            | 3.66 | 4.02 | 3.57 | 1.79 | 3.81 | 4.59 | 1.35 |
| 2                                                                                       | TS1 <sub>NEB</sub> (energy barrier = 134.9 kJ/mol) |                                  | 43.3            | 2.02                            | 2.13 | 3.39 | 3.30 | 1.84 | 2.74 | 3.55 | 1.42 |
| 3                                                                                       | Chemisorption (full opt, local min)                |                                  | -275.0          | 1.51                            | 1.51 | 3.06 | 3.06 | 2.08 | 2.55 | 3.38 | 1.53 |
| First C-H bond formation – H3G3 distance is constrained (except in full optimizations)  |                                                    |                                  |                 |                                 |      |      |      |      |      |      |      |
| -                                                                                       |                                                    | H3G3                             | Energy (kJ/mol) | E1G1                            | E2G2 | E1G3 | E2G4 | G3G4 | G3H3 | E1H3 | E1E2 |
| 3                                                                                       | Chemisorption (full opt, local min)                | 2.6                              | -275.0          | 1.51                            | 1.51 | 3.06 | 3.06 | 2.08 | 2.55 | 1.09 | 1.53 |
| 4                                                                                       |                                                    | 2.4                              | --274.9         | 1.51                            | 1.51 | 3.03 | 3.09 | 2.08 | 2.38 | 1.10 | 1.52 |
| 5                                                                                       |                                                    | 2.2                              | -272.4          | 1.51                            | 1.51 | 2.95 | 3.14 | 2.08 | 2.17 | 1.10 | 1.52 |
| 6                                                                                       |                                                    | 2.0                              | -267.4          | 1.51                            | 1.51 | 2.87 | 3.13 | 2.10 | 2.01 | 1.11 | 1.52 |
| 7                                                                                       |                                                    | 1.8                              | -254.1          | 1.51                            | 1.51 | 2.76 | 3.14 | 2.11 | 1.80 | 1.12 | 1.51 |
| 8                                                                                       |                                                    | 1.6                              | -229.1          | 1.51                            | 1.50 | 2.64 | 3.11 | 2.15 | 1.59 | 1.15 | 1.50 |
| 9                                                                                       | TS2 (energy barrier = 80.3 kJ/mol)                 | 1.4                              | -191.7          | 1.50                            | 1.50 | 2.52 | 3.03 | 2.26 | 1.38 | 1.22 | 1.49 |
| -                                                                                       |                                                    | 1.2                              | -208.7          | 1.31                            | 1.51 | 2.80 | 2.52 | 2.15 | 1.22 | 2.48 | 1.48 |
| 10                                                                                      | Local min (full opt of H3G3=1.2)                   | 1.1                              | -325.1          | 1.73                            | 1.49 | 2.52 | 2.60 | 2.82 | 1.10 | 2.32 | 1.52 |
| Second C-H bond formation – H4G4 distance is constrained (except in full optimizations) |                                                    |                                  |                 |                                 |      |      |      |      |      |      |      |
|                                                                                         |                                                    | H4G4                             | Energy (kJ/mol) | E1G1                            | E2G2 | E1G3 | E2G4 | G3G4 | G4H4 | E2H4 | E1E2 |
| 10                                                                                      | Local min (full opt of H3G3=1.2)                   | 2.65                             | -325.1          | 1.73                            | 1.49 | 2.52 | 2.60 | 2.82 | 2.65 | 1.11 | 1.52 |
| 11                                                                                      |                                                    | 2.5                              | -322.2          | 1.73                            | 1.49 | 2.51 | 2.55 | 2.83 | 2.49 | 1.11 | 1.52 |
| 12                                                                                      |                                                    | 2.3                              | -309.8          | 1.69                            | 1.49 | 2.51 | 2.51 | 2.83 | 2.28 | 1.11 | 1.51 |
| 13                                                                                      |                                                    | 2.1                              | -286.7          | 1.65                            | 1.49 | 2.51 | 2.48 | 2.85 | 2.06 | 1.11 | 1.51 |
| 14                                                                                      |                                                    | 1.8                              | -240.9          | 1.57                            | 1.49 | 2.51 | 2.46 | 2.86 | 1.80 | 1.13 | 1.50 |
| 15                                                                                      | TS2 (energy barrier = 136.0 kJ/mol)                | 1.6                              | -189.1          | 1.51                            | 1.48 | 2.53 | 2.44 | 2.87 | 1.59 | 1.18 | 1.49 |
| 16                                                                                      |                                                    | 1.4                              | -395.3          | 1.46                            | 1.47 | 3.01 | 2.89 | 2.79 | 1.38 | 2.00 | 1.35 |
| -                                                                                       |                                                    | 1.2                              | -463.3          | 1.46                            | 1.47 | 3.01 | 2.86 | 2.79 | 1.16 | 2.11 | 1.35 |
| 17                                                                                      | Local min (full opt of H4G4=1.2)                   |                                  | -471.1          | 1.46                            | 1.47 | 3.00 | 2.85 | 2.79 | 1.09 | 2.14 | 1.34 |

**Table S2.** Continued. Geometries corresponding to the interaction of Ethylene with DV through DVP mechanism.

| C-C bond formation – First E2G2, then E1G3 distances are constrained (except in full optimizations) |                                     |             |                 |      |      |      |      |      |      |      |      |
|-----------------------------------------------------------------------------------------------------|-------------------------------------|-------------|-----------------|------|------|------|------|------|------|------|------|
| -                                                                                                   |                                     | E2G4 (E1G3) | Energy (kJ/mol) | E1G1 | E2G2 | E1G3 | E2G4 | G3G4 | G3H3 | G4H4 | E1E2 |
| 17                                                                                                  | Local min (full opt of H4G4=1.2)    |             | -471.1          | 1.46 | 1.47 | 3.00 | 2.85 | 2.79 | 1.09 | 1.09 | 1.34 |
| 18                                                                                                  |                                     | 2.6         | -456.7          | 1.46 | 1.46 | 2.92 | 2.59 | 2.80 | 1.10 | 1.08 | 1.34 |
| 19                                                                                                  |                                     | 2.4         | -417.3          | 1.46 | 1.47 | 2.94 | 2.38 | 2.79 | 1.09 | 1.08 | 1.35 |
| 20                                                                                                  |                                     | 2.2         | -350.4          | 1.47 | 1.48 | 2.98 | 2.17 | 2.80 | 1.10 | 1.08 | 1.35 |
| 21                                                                                                  |                                     | 2.0         | -274.9          | 1.47 | 1.51 | 2.92 | 1.96 | 2.81 | 1.09 | 1.08 | 1.37 |
| 22                                                                                                  |                                     | 1.8         | -253.5          | 1.41 | 1.53 | 2.63 | 1.80 | 2.80 | 1.08 | 1.11 | 1.44 |
| 23                                                                                                  | TS3 (energy barrier = 223.0 kJ/mol) | 1.6         | -248.1          | 1.41 | 1.56 | 2.57 | 1.59 | 2.82 | 1.09 | 1.11 | 1.46 |
| 24                                                                                                  |                                     | (2.4)       | -249.2          | 1.42 | 1.55 | 2.38 | 1.68 | 2.75 | 1.08 | 1.12 | 1.45 |
| 25                                                                                                  |                                     | (2.2)       | -249.5          | 1.48 | 1.55 | 2.17 | 1.67 | 2.66 | 1.10 | 1.12 | 1.45 |
| 26                                                                                                  |                                     | (2.0)       | -265.9          | 1.50 | 1.55 | 2.01 | 1.65 | 2.64 | 1.11 | 1.12 | 1.46 |
| 27                                                                                                  |                                     | (1.8)       | -300.3          | 1.53 | 1.55 | 1.80 | 1.62 | 2.61 | 1.12 | 1.13 | 1.48 |
| -                                                                                                   |                                     | (1.6)       | -321.0          | 1.56 | 1.56 | 1.59 | 1.61 | 2.59 | 1.13 | 1.13 | 1.49 |
| 28                                                                                                  | Local min (full opt of E1G3 =1.6)   |             | -321.4          | 1.55 | 1.56 | 1.61 | 1.61 | 2.59 | 1.13 | 1.13 | 1.49 |

**Table S3.** Geometries corresponding to the interaction of Acetylene with DV through DVH mechanism.

| Acetylene-DVH             |                                                   |                                  |                 |                                 |      |      |      |      |      |      |
|---------------------------|---------------------------------------------------|----------------------------------|-----------------|---------------------------------|------|------|------|------|------|------|
| X axis                    | Note                                              | Distance in initial geometry (Å) | Y axis          | Distances in final geometry (Å) |      |      |      |      |      |      |
| Healing - NEB calculation |                                                   |                                  |                 |                                 |      |      |      |      |      |      |
| -                         |                                                   |                                  | Energy (kJ/mol) | A1G1                            | A2G2 | A1G3 | A2G4 | G1G2 | G3G4 | A1A2 |
| -                         | No interaction                                    | Far                              | 0               | -                               | -    | -    | -    | -    |      |      |
| 1                         | Physisorption (full opt, local min)               |                                  | -90.8           | 3.22                            | 3.24 | 3.21 | 2.23 | 1.79 | 1.79 | 1.22 |
| 2                         | TS1 <sub>NEB</sub> (energy barrier = 58.0 kJ/mol) |                                  | -32.8           | 2.26                            | 2.61 | 2.25 | 2.60 | 1.94 | 1.94 | 1.25 |
| 3                         | Product (full opt, local min)                     |                                  | -933.2          | 1.51                            | 1.51 | 1.51 | 1.51 | 2.51 | 2.51 | 1.55 |



**Table S4.** Geometries corresponding to the interaction of Acetylene with DV through DVP mechanism.

| Acetylene-DVP                           |                                                    |                                  |                 |                                 |      |      |      |      |      |      |
|-----------------------------------------|----------------------------------------------------|----------------------------------|-----------------|---------------------------------|------|------|------|------|------|------|
| X axis                                  | Note                                               | Distance in initial geometry (Å) | Y axis          | Distances in final geometry (Å) |      |      |      |      |      |      |
| Chemisorption - NEB calculation         |                                                    |                                  |                 |                                 |      |      |      |      |      |      |
| -                                       |                                                    |                                  | Energy (kJ/mol) | A1G1                            | A2G2 | A1G3 | A2G4 | G1G2 | G3G4 | A1A2 |
| -                                       | No interaction                                     | Far                              | 0               | -                               | -    | -    | -    | -    |      |      |
| 1                                       | Physisorption (full opt, local min)                |                                  | -88.1           | 3.40                            | 3.47 | 3.53 | 3.70 | 1.79 | 1.79 | 1.21 |
| 2                                       | TS1 <sub>NEB</sub> (energy barrier =123.0 kJ/mol)  |                                  | 34.9            | 2.06                            | 2.11 | 3.43 | 3.47 | 2.0  | 1.80 | 1.26 |
| 3                                       | Chemisorption (full opt, local min)                |                                  | -381.3          | 1.46                            | 1.46 | 2.92 | 2.92 | 2.82 | 2.04 | 1.34 |
| Two C-C bond formation- NEB calculation |                                                    |                                  |                 |                                 |      |      |      |      |      |      |
| -                                       |                                                    |                                  | Energy (kJ/mol) | A1G1                            | A2G2 | A1G3 | A2G4 | G1G2 | G3G4 | A1A2 |
| 3                                       | Chemisorption (full opt, local min)                |                                  | -381.3          | 1.46                            | 1.46 | 2.92 | 2.92 | 2.82 | 2.04 | 1.34 |
| 4                                       | TS2 <sub>NEB</sub> (energy barrier = 154.7 kJ/mol) |                                  | -226.6          | 1.46                            | 1.50 | 2.53 | 2.03 | 2.82 | 2.43 | 1.42 |
| 5                                       | Product (Full opt, , local min)                    |                                  | -587.8          | 1.55                            | 1.55 | 1.55 | 1.55 | 2.83 | 2.83 | 1.49 |

**Table S5.** Geometries corresponding to the interaction of Acetylene with NP through DVH mechanism.

| Acetylene-NP-DVH          |                                                   |                                  |                 |                                 |      |      |      |      |      |      |
|---------------------------|---------------------------------------------------|----------------------------------|-----------------|---------------------------------|------|------|------|------|------|------|
| X axis                    | Note                                              | Distance in initial geometry (Å) | Y axis          | Distances in final geometry (Å) |      |      |      |      |      |      |
| Healing - NEB Calculation |                                                   |                                  |                 |                                 |      |      |      |      |      |      |
| -                         |                                                   |                                  | Energy (kJ/mol) | A1G1                            | A2G3 | A1G2 | A2N  | G1G2 | G3N  | A1A2 |
| -                         | No interaction                                    | Far                              | 0               | -                               | -    | -    | -    | -    | -    | -    |
| 1                         | Physisorption (full opt, local min)               |                                  | -89.6           | 3.35                            | 3.07 | 3.43 | 3.42 | 1.89 | 2.36 | 1.22 |
| 2                         | TS1 <sub>NEB</sub> (energy barrier = 14.0 kJ/mol) |                                  | -75.6           | 2.83                            | 2.33 | 2.96 | 2.85 | 1.99 | 2.42 | 1.23 |
| 3                         | Product (full opt, local min)                     |                                  | -911.6          | 1.51                            | 1.51 | 1.51 | 1.53 | 2.50 | 2.48 | 1.55 |

**Table S6.** Geometries corresponding to interaction of Acetylene with NP1 through DVP mechanism (Acetylene is chemisorbed on G1 and G2)

| Acetylene-NP-DVP                             |                                                    |                                  |                 |                                 |      |      |      |      |      |      |
|----------------------------------------------|----------------------------------------------------|----------------------------------|-----------------|---------------------------------|------|------|------|------|------|------|
| X axis                                       | Note                                               | Distance in initial geometry (Å) | Y axis          | Distances in final geometry (Å) |      |      |      |      |      |      |
| Chemisorption – NEB Calculation              |                                                    |                                  |                 |                                 |      |      |      |      |      |      |
| -                                            |                                                    |                                  | Energy (kJ/mol) | A1G1                            | A2G2 | A1G3 | A2N  | G1G2 | G3N  | A1A2 |
| -                                            | No interaction                                     | Far                              | 0               | -                               | -    | -    | -    |      |      |      |
| 1                                            | Physisorption (full opt, local min)                |                                  | -89.3           | 3.38                            | 3.37 | 4.82 | 4.49 | 1.87 | 2.35 | 1.21 |
| 2                                            | TS1 <sub>NEB</sub> (energy barrier = 103.7 kJ/mol) |                                  | 14.4            | 2.22                            | 2.09 | 3.47 | 3.37 | 2.12 | 2.39 | 1.25 |
| 3                                            | Chemisorption (full opt, local min)                |                                  | -448.4          | 1.46                            | 1.45 | 2.65 | 2.81 | 2.86 | 2.53 | 1.35 |
| C-C and C-N bond formation - NEB Calculation |                                                    |                                  |                 |                                 |      |      |      |      |      |      |
|                                              |                                                    |                                  | Energy (kJ/mol) | A1G1                            | A2G2 | A1G3 | A2N  | G1G2 | G3N  | A1A2 |
| 3                                            | Chemisorption (full opt, local min)                |                                  | -448.4          | 1.46                            | 1.45 | 2.65 | 2.81 | 2.86 | 2.53 | 1.35 |
| 4                                            | TS2 <sub>NEB</sub> (energy barrier = 7.4 kJ/mol)   |                                  | -441.0          | 1.47                            | 1.44 | 2.30 | 2.64 | 2.86 | 2.61 | 1.37 |
| 5                                            | Product (full opt, local min)                      |                                  | -572.0          | 1.56                            | 1.55 | 1.55 | 1.58 | 2.80 | 2.76 | 1.48 |

**Table S7.** Geometries corresponding to interaction of Acetylene with  $N_p^2$  through DVP mechanism (Acetylene is chemisorbed on G1 and G2)

| Acetylene-NP-DVP                             |                                                    |                                  |                 |                                 |      |      |      |      |      |      |
|----------------------------------------------|----------------------------------------------------|----------------------------------|-----------------|---------------------------------|------|------|------|------|------|------|
| X axis                                       | Note                                               | Distance in initial geometry (Å) | Y axis          | Distances in final geometry (Å) |      |      |      |      |      |      |
| Chemisorption – NEB Calculation              |                                                    |                                  |                 |                                 |      |      |      |      |      |      |
| -                                            |                                                    |                                  | Energy (kJ/mol) | A1G1                            | A2G2 | A1G3 | A2N  | G1G2 | G3N  | A1A2 |
| -                                            | No interaction                                     | Far                              | 0               | -                               | -    | -    | -    |      |      |      |
| 1                                            | Physisorption (full opt, local min)                |                                  | -88.7           | 3.57                            | 3.51 | 3.60 | 3.17 | 1.86 | 2.34 | 1.21 |
| 2                                            | TS1 <sub>NEB</sub> (energy barrier = 28.5 kJ/mol)  |                                  | -59.5           | 3.24                            | 3.50 | 2.22 | 2.99 | 1.91 | 2.44 | 1.24 |
| 3                                            | Chemisorption (full opt, local min)                |                                  | -405.4          | 2.96                            | 2.98 | 1.48 | 1.49 | 1.88 | 2.64 | 1.33 |
| C-C and C-N bond formation - NEB Calculation |                                                    |                                  |                 |                                 |      |      |      |      |      |      |
|                                              |                                                    |                                  | Energy (kJ/mol) | A1G1                            | A2G2 | A1G3 | A2N  | G1G2 | G3N  | A1A2 |
| 3                                            | Chemisorption (full opt, local min)                |                                  | -405.4          | 2.96                            | 2.98 | 1.48 | 1.49 | 1.88 | 2.64 | 1.33 |
| 4                                            | TS2 <sub>NEB</sub> (energy barrier = 153.3 kJ/mol) |                                  | -252.1          | 2.60                            | 1.97 | 1.43 | 1.54 | 2.39 | 2.73 | 1.41 |
| 5                                            | Product (full opt, local min)                      |                                  | -572.0          | 1.56                            | 1.55 | 1.55 | 1.58 | 2.80 | 2.76 | 1.48 |

**Table S8.** Geometries corresponding to the interaction of Acetylene with N<sub>G1</sub> through DVH mechanism.

| Acetylene-NG1-DVH         |                                                    |                                  |                 |                                 |      |      |      |      |      |      |
|---------------------------|----------------------------------------------------|----------------------------------|-----------------|---------------------------------|------|------|------|------|------|------|
| X axis                    | Note                                               | Distance in initial geometry (Å) | Y axis          | Distances in final geometry (Å) |      |      |      |      |      |      |
| Healing – NEB Calculation |                                                    |                                  |                 |                                 |      |      |      |      |      |      |
| -                         |                                                    |                                  | Energy (kJ/mol) | A1G1                            | A1G2 | A2G3 | A2G4 | G1G2 | G3G4 | A1A2 |
| -                         | No interaction                                     | Far                              |                 | -/                              | -    | -    | -    |      |      |      |
| 1                         | Physisorption (full opt, local min)                |                                  | -88.2           | 3.56                            | 3.56 | 3.33 | 3.33 | 1.66 | 1.69 | 1.21 |
| 2                         | TS <sub>1NEB</sub> (energy barrier = 104.2 kJ/mol) |                                  | 16.0            | 2.62                            | 2.90 | 1.90 | 2.55 | 1.78 | 2.00 | 1.26 |
| 3                         | Product (full opt, local min)                      |                                  | -853.3          | 1.51                            | 1.51 | 1.51 | 1.51 | 2.48 | 2.51 | 1.55 |

**Table S9.** Geometries corresponding to the interaction of Acetylene with N<sub>G1</sub> through DVP mechanism.

| Acetylene-NG1-DVP                        |                                                             |                                  |                 |                                 |      |      |      |      |      |      |
|------------------------------------------|-------------------------------------------------------------|----------------------------------|-----------------|---------------------------------|------|------|------|------|------|------|
| X axis                                   | Note                                                        | Distance in initial geometry (Å) | Y axis          | Distances in final geometry (Å) |      |      |      |      |      |      |
| Chemisorption – NEB Calculation          |                                                             |                                  |                 |                                 |      |      |      |      |      |      |
| -                                        |                                                             |                                  | Energy (kJ/mol) | A1G1                            | A2G2 | A1G3 | A2G4 | G1G2 | G3G4 | A1A2 |
| -                                        | No interaction                                              | Far                              | 0               | -                               | -    | -    | -    |      |      |      |
| 1                                        | Physisorption (full opt, local min)                         |                                  | -88.2           | 3.48                            | 3.51 | 3.65 | 3.64 | 1.66 | 1.69 | 1.21 |
| 2                                        | TS1                                                         |                                  |                 | No data                         |      |      |      |      |      |      |
| 3                                        | Chemisorption (full opt, local min)                         |                                  | -355.6          | 2.91                            | 2.91 | 1.46 | 1.46 | 1.77 | 2.80 | 1.34 |
| Two C-C bond formation - NEB Calculation |                                                             |                                  |                 |                                 |      |      |      |      |      |      |
|                                          |                                                             |                                  | Energy (kJ/mol) | A1G1                            | A2G2 | A1G3 | A2G4 | G1G2 | G3G4 | A1A2 |
| 3                                        | Chemisorption (full opt, local min, starting point of scan) |                                  | -355.6          | 2.91                            | 2.91 | 1.46 | 1.46 | 1.77 | 2.80 | 1.34 |
| 4                                        | TS2 <sub>NEB</sub> (energy barrier = 153.2 kJ/mol)          |                                  | -202.4          | 2.02                            | 2.50 | 1.43 | 1.42 | 2.46 | 2.83 | 1.42 |
| 5                                        | Product (full opt of A1G1=1.8)                              |                                  | -496.9          | 1.56                            | 1.56 | 1.55 | 1.55 | 2.77 | 2.82 | 1.48 |

**Table S10.** Geometries corresponding to the interaction of Acetylene with NG<sub>2</sub> through DVH mechanism.

| Acetylene-NG <sub>2</sub> -DVH |                                                   |                                  |                 |                                 |      |      |      |      |      |      |
|--------------------------------|---------------------------------------------------|----------------------------------|-----------------|---------------------------------|------|------|------|------|------|------|
| X axis                         | Note                                              | Distance in initial geometry (Å) | Y axis          | Distances in final geometry (Å) |      |      |      |      |      |      |
| Healing – NEB Calculation      |                                                   |                                  |                 |                                 |      |      |      |      |      |      |
| -                              |                                                   |                                  | Energy (kJ/mol) | A1G1                            | A1G2 | A2G3 | A2G4 | G1G2 | G3G4 | A1A2 |
| -                              | No interaction                                    | Far                              |                 |                                 |      |      |      |      |      |      |
| 1                              | Physisorption (full opt, local min)               |                                  | -88.6           | 3.43                            | 3.45 | 3.34 | 3.39 | 1.64 | 1.70 | 1.21 |
| 2                              | TSl <sub>NEB</sub> (energy barrier = 97.0 kJ/mol) |                                  | 8.4             | 2.24                            | 2.65 | 2.22 | 2.64 | 1.81 | 1.92 | 1.25 |
| 3                              | Product (full opt, local min)                     |                                  | -866.5          | 1.51                            | 1.51 | 1.51 | 1.51 | 2.50 | 2.51 | 1.56 |

**Table S11.** Geometries corresponding to the interaction of Acetylene with NG<sub>2</sub> through DVP mechanism.

| Acetylene-NG <sub>2</sub> -DVP           |                                                    |                                  |                 |                                 |      |      |      |      |      |      |
|------------------------------------------|----------------------------------------------------|----------------------------------|-----------------|---------------------------------|------|------|------|------|------|------|
| X axis                                   | Note                                               | Distance in initial geometry (Å) | Y axis          | Distances in final geometry (Å) |      |      |      |      |      |      |
| Chemisorption – NEB Calculation          |                                                    |                                  |                 |                                 |      |      |      |      |      |      |
| -                                        |                                                    |                                  | Energy (kJ/mol) | A1G1                            | A2G2 | A1G3 | A2G4 | G1G2 | G3G4 | A1A2 |
| -                                        | No interaction                                     | Far                              |                 |                                 |      |      |      |      |      |      |
| 1                                        | Physisorption (full opt, local min)                |                                  | -87.8           | 3.66                            | 3.71 | 3.52 | 3.51 | 1.64 | 1.70 | 1.21 |
| 2                                        | TS1                                                |                                  |                 | No data                         |      |      |      |      |      |      |
| 3                                        | Chemisorption (full opt, local min)                |                                  | -349.1          | 2.91                            | 2.93 | 1.46 | 1.46 | 1.72 | 2.79 | 1.34 |
| Two C-C bond formation - NEB Calculation |                                                    |                                  |                 |                                 |      |      |      |      |      |      |
|                                          |                                                    |                                  | Energy (kJ/mol) | A1G1                            | A2G2 | A1G3 | A2G4 | G1G2 | G3G4 | A1A2 |
| 3                                        | Chemisorption (full opt, local min)                |                                  | -349.1          | 2.91                            | 2.93 | 1.46 | 1.46 | 1.72 | 2.79 | 1.34 |
| 4                                        | TS <sub>2NEB</sub> (energy barrier = 117.1 kJ/mol) |                                  | -232.0          | 2.56                            | 2.07 | 1.43 | 1.50 | 2.46 | 2.83 | 1.40 |
| 5                                        | Product (full opt, local min)                      |                                  | -504.2          | 1.57                            | 1.55 | 1.56 | 1.56 | 2.79 | 2.83 | 1.48 |



**Table S12.** Geometries corresponding to interaction of Acetylene with S<sub>G</sub> through DVH mechanism.

| DVG-S-Acetylene           |                                                       |                                  |                 |                                 |      |      |      |      |      |      |
|---------------------------|-------------------------------------------------------|----------------------------------|-----------------|---------------------------------|------|------|------|------|------|------|
| X axis                    |                                                       | Distance in initial geometry (Å) | Y axis          | Distances in final geometry (Å) |      |      |      |      |      |      |
| Healing – NEB Calculation |                                                       |                                  |                 |                                 |      |      |      |      |      |      |
| -                         | Note                                                  |                                  | Energy (kJ/mol) | A1G1                            | A1G2 | A2G3 | A2S  | G1G2 | G3S  | A1A2 |
| -                         | No interaction                                        | -                                | 0               |                                 |      |      |      |      |      |      |
| 1                         | Physisorption (full opt, local min)                   |                                  | -152.4          | 3.30                            | 3.29 | 3.4  | 3.85 | 1.84 | 2.09 | 1.21 |
| 2                         | TS1 (energy barrier = 49.0 kJ/mol)                    |                                  | -103.4          | 2.96                            | 3.19 | 1.94 | 2.94 | 2.00 | 2.32 | 1.26 |
| 3                         | Product (full opt, local min, starting point of scan) |                                  | -809.6          | 1.50                            | 1.51 | 1.49 | 1.85 | 2.50 | 2.62 | 1.52 |

**Table S13.** Geometries corresponding to the interaction of Acetylene with S<sub>G</sub> through DVP mechanism.

| Acetylene-GS-DVP                                                                 |                                                             |                                  |                 |                                 |      |      |      |      |      |      |
|----------------------------------------------------------------------------------|-------------------------------------------------------------|----------------------------------|-----------------|---------------------------------|------|------|------|------|------|------|
| X axis                                                                           | Note                                                        | Distance in initial geometry (Å) | Y axis          | Distances in final geometry (Å) |      |      |      |      |      |      |
| Chemisorption – Neb Calculation                                                  |                                                             |                                  |                 |                                 |      |      |      |      |      |      |
| -                                                                                |                                                             |                                  | Energy (kJ/mol) | A1G1                            | A2G2 | A1G3 | A2S  | G1G2 | G3S  | A1A2 |
| -                                                                                | No interaction                                              | -                                | 0               | -                               | -    | -    | -    | -    | -    | -    |
| 1                                                                                | Physisorption (full opt, local min)                         |                                  | -150.8          | 3.49                            | 3.48 | 3.49 | 4.03 | 1.82 | 2.09 | 1.21 |
| 2                                                                                | TS1                                                         |                                  |                 | No data                         |      |      |      |      |      |      |
| 3                                                                                | Chemisorption (full opt, local min, starting point of scan) |                                  | -508.6          | 1.47                            | 1.46 | 2.82 | 2.90 | 2.81 | 2.25 | 1.34 |
| C-C bond formation – A1G3 distance is constrained (except in full optimizations) |                                                             |                                  |                 |                                 |      |      |      |      |      |      |
|                                                                                  |                                                             | A1G3                             | Energy (kJ/mol) | A1G1                            | A2G2 | A1G3 | A2S  | G1G2 | G3S  | A1A2 |
| 3                                                                                | Chemisorption (full opt, local min, starting point of scan) | 2.8                              | -508.6          | 1.47                            | 1.46 | 2.82 | 2.90 | 2.81 | 2.25 | 1.34 |
| 4                                                                                |                                                             | 2.6                              | -504.1          | 1.47                            | 1.46 | 2.59 | 2.89 | 2.82 | 2.31 | 1.35 |
| 5                                                                                |                                                             | 2.4                              | -491.3          | 1.48                            | 1.45 | 2.38 | 2.90 | 2.81 | 2.40 | 1.36 |
| 6                                                                                | TS2 (energy barrier = 29.7 kJ/mol)                          | 2.2                              | -478.9          | 1.49                            | 1.43 | 2.17 | 2.92 | 2.81 | 2.56 | 1.38 |
| 7                                                                                |                                                             | 2                                | -479.7          | 1.50                            | 1.40 | 2.01 | 2.92 | 2.83 | 2.81 | 1.41 |
| 8                                                                                |                                                             | 1.8                              | -492.5          | 1.53                            | 1.40 | 1.80 | 2.91 | 2.82 | 2.97 | 1.44 |
| -                                                                                |                                                             | 1.6                              | -496.7          | 1.56                            | 1.39 | 1.59 | 2.87 | 2.82 | 3.09 | 1.46 |
| 9                                                                                | Local min (full opt of A1G3=1.6)                            | 1.6                              | -499.9          | 1.55                            | 1.39 | 1.65 | 2.88 | 2.82 | 3.08 | 1.45 |
| C-S bond formation – A2S distance is constrained (except in full optimizations)  |                                                             |                                  |                 |                                 |      |      |      |      |      |      |
|                                                                                  |                                                             | A2S                              | Energy (kJ/mol) | A1G1                            | A2G2 | A1G3 | A2S  | G1G2 | G3S  | A1A2 |
| 9                                                                                | Local min (full opt of A1G3=1.6, starting point of scan)    |                                  | -499.9          | 1.55                            | 1.39 | 1.65 | 2.88 | 2.82 | 3.08 | 1.45 |
| 10                                                                               |                                                             | 2.6                              | -486.9          | 1.55                            | 1.40 | 1.64 | 2.59 | 2.83 | 2.97 | 1.45 |
| 11                                                                               | TS3 (energy barrier = 30.5 kJ/mol)                          | 2.4                              | -469.4          | 1.55                            | 1.42 | 1.62 | 2.38 | 2.84 | 2.91 | 1.45 |
| 12                                                                               |                                                             | 2.2                              | -472.8          | 1.55                            | 1.47 | 1.60 | 2.17 | 2.84 | 2.78 | 1.47 |
| 13                                                                               |                                                             | 2                                | -493.5          | 1.55                            | 1.51 | 1.60 | 2.01 | 2.84 | 2.69 | 1.48 |
| -                                                                                |                                                             | 1.8                              | -505.8          | 1.55                            | 1.54 | 1.59 | 1.80 | 2.84 | 2.65 | 1.49 |
| 14                                                                               | Product (full opt of A2S=1.8, local min)                    |                                  | -507.2          | 1.55                            | 1.53 | 1.59 | 1.84 | 2.84 | 2.65 | 1.49 |

## Discussion on the energy barriers of all reaction paths described in Table 1 and Table 2

Tables 1 and 2, from the main manuscript, are reproduced below for the sake of comparison.

- Barrier I in Eth-DV-DVH is lower than Barrier I in Eth-DV-DVP (56.9 versus 134.9 kJ/mol) due to the less stable transition state of the former resulting from the stress-induced seven-membered ring formation which is folded not planar.
- Barrier II in Eth-DV-DVH is higher than Barrier II in Eth-DV-DVP (126.4 versus 80.3 kJ/mol). After ethylene chemisorption, due to larger distances between G1G3 and G2G4 in comparison with G1G2 and G3G4, stress induces in structure by approaching hydrogen to G3 breaks the G3G4 reconstruction and facilitate hydrogen transfer in Eth-DV-DVP. However, by approaching hydrogen to G4 in Eth-DV-DVH, the G3 also approaches G4 and makes it more stabilized.
- Barrier III in Eth-DV-DVH is lower than Barrier II in Eth-DV-DVH (38.0 versus 126.4 kJ/mol). The second hydrogen transfer and C-C bond formation in Eth-DV-DVH is more facilitated, due to the presence of stabilized undercoordinated carbon for second hydrogen transfer and C-C bond formation.
- Barrier III in Eth-DV-DVP is higher than Barrier II in Eth-DV-DVP (136.0 versus 80.3 kJ/mol). After first hydrogen transfer to G3, reconstruction between G3 and G4 is broken. This makes undercoordinated G4 extremely reactive which is then stabilized by attracting E1. The stabilization effect of E1 on G4 makes the second hydrogen transfer to G4 more difficult and the barrier for second hydrogen transfer increases in comparison with first hydrogen transfer.
- Barrier I in Ace-DV-DVH is comparable with barrier I in Eth-DV-DVH (58.0 versus 56.9 kJ/mol). Acetylene is more reactive than ethylene. When DV reconstruction break due to Acetylene adsorption through DVH, acetylene can further fill the DV. However, ethylene is chemisorbed on DV.
- Barrier I in Ace-DV-DVP is lower than barrier I in Eth-DV-DVP: (123.0 versus 134.9 kJ/mol). Acetylene is more reactive than ethylene.
- Barrier II in Ace-DV-DVP is higher than Barrier I in Ace-DV-DVP (154.7 versus 123.0 kJ/mol). As reactants, acetylene is more reactive than chemisorbed acetylene.
- Barrier I in Ace-N<sub>p</sub>-DVH is lower than Barrier I in Ace-DV-DVH (14.0 versus 58.0 kJ/mol). As shown in table 3, nitrogen has less stabilization effect on G4 in N<sub>p</sub>, in comparison with stabilization effect of G<sub>3</sub> on G<sub>4</sub> in DV (NG<sub>4</sub> =2.36 versus G<sub>3</sub>G<sub>4</sub>=1.79 Å). Therefore, G<sub>3</sub> in N<sub>p</sub> is extremely reactive in comparison with G<sub>3</sub> in DV.
- Barrier I in Ace-N<sub>p</sub>-DVP is lower than Barrier I in Ace-DV-DVP (103.8 versus 123.0 kJ/mol). In both cases, acetylene interacts with reconstructed G1G2, but the reconstruction length in N<sub>p</sub> is higher than that of DV (G1G2 (N<sub>p</sub>) = 1.91 versus G1G2 (DV) =1.79 Å). Therefore, N<sub>p</sub> is more reactive than DV toward acetylene interaction.
- Barrier II in Ace-N<sub>p</sub>-DVP is lower than Barrier II in Ace-DV-DVP (7.4 versus 154.7 kJ/mol). As shown in table 3, nitrogen has less stabilization effect on G4 in N<sub>p</sub>, in comparison with stabilization effect of G<sub>3</sub> on G<sub>4</sub> in DV (HG<sub>4</sub> =2.36 versus G<sub>3</sub>G<sub>4</sub>=1.79 Å). Therefore, G<sub>3</sub> in N<sub>p</sub> is extremely reactive in comparison with G<sub>3</sub> in DV.
- Barrier I in Ace-N<sub>G1</sub>-DVP is higher than barrier I in Ace-DV-DVH (104.2 versus 58.0 kJ/mol). As shown in Table 3, the G1G2 in N<sub>G1</sub> is 1.69 Å, but G1G2 in DV is 1.79 Å, moreover electron donating effect of nitrogen more stabilized G1 and G2, symmetrically.
- Barrier I in Ace-N<sub>G2</sub>-DVP is higher than barrier I in Ace-DV-DVH (97.0 versus 58.0 kJ/mol). As shown in Table 3, the G1G2 in N<sub>G2</sub> is 1.70 but G1G2 in DV is 1.79, moreover electron donating effect of nitrogen more stabilized G1 and G2, unsymmetrically.
- Barrier I in Ace-N<sub>G1</sub>-DVP is comparable with barrier I in Ace-N<sub>G2</sub>-DVP (104.2 versus 97.0 kJ/mol). As shown in Table 3, the G1G2 in N<sub>G1</sub> is 1.69 and G1G2 in N<sub>G2</sub> is 1.70, moreover stabilization effect of nitrogen on G1 and G2 in N<sub>G1</sub> is symmetrical, however, stabilization effect of nitrogen on G1 and G2 in N<sub>G2</sub> is unsymmetrical.

- Barrier II in Ace- $N_{G1}$ -DVP is comparable with barrier II in Ace-DV-DVP (153.2 versus 154.7 kJ/mol). G3G4 in both cases are very similar and nitrogen of  $N_{G1}$  is far enough to not affect the amount of barrier IIs.
- Barrier II in Ace- $N_{G2}$ -DVP is lower than barrier II in Ace- $N_{G1}$ -DVP (117.1 versus 153.2 kJ/mol). A1 carbon of acetylene is more influenced by electron donating effect of nitrogen of  $N_{G2}$  in comparison with  $N_{G1}$ , due to two carbon space between nitrogen and A1 in  $N_{G1}$  and three carbon space between nitrogen and A1 in  $N_{G2}$ .
- Barrier I in Ace- $S_G$ -DVH is slightly lower than barrier I in Ace-DV-DVH (49.0 versus 58.0 kJ/mol). As shown in table 3, G1G2 and G3S in  $S_G$  are 1.96 Å and 1.94 Å respectively, however G1G2 and G3G4 in DV are both equal to 1.79 Å. On the other hand, large size of sulfur in comparison with carbon induces some stress in defective graphene structure.

**Table 1.** Energies (kJ/mol) of the different steps of the reaction of ethylene with DV.

| GBM | Approach | Physisorption      | Barrier I          | Chemisorption       | Barrier II         | Local Min           | Barrier III        | Local Min           | Barrier IV         | Local Min           |
|-----|----------|--------------------|--------------------|---------------------|--------------------|---------------------|--------------------|---------------------|--------------------|---------------------|
| DV  | DVH*     | -93.6 <sup>a</sup> | 56.9 <sup>b</sup>  | -199.8 <sup>c</sup> | 126.4 <sup>d</sup> | -367.5 <sup>e</sup> | 38.0 <sup>f</sup>  | -632.1 <sup>g</sup> | -                  | -                   |
| DV  | DVP**    | -91.9 <sup>a</sup> | 134.9 <sup>b</sup> | -275.0 <sup>c</sup> | 80.3 <sup>d</sup>  | -325.1 <sup>e</sup> | 136.0 <sup>f</sup> | -471.1 <sup>h</sup> | 223.0 <sup>i</sup> | -321.4 <sup>j</sup> |

\* The geometries corresponding to this path shown in Figure 3, (a) to (g)

\*\* The geometries corresponding to this path shown in Figure 4, (a) to (j)

**Table 2.** Energies (kJ/mol) of the different steps of the reaction of acetylene with DVs (\* = No data)

| GBM      | Approach | Physisorption      | Barrier I          | Chemisorption       | Barrier II         | Local Min | Barrier III | Product             |
|----------|----------|--------------------|--------------------|---------------------|--------------------|-----------|-------------|---------------------|
| DV       | DVH*     | -90.8 <sup>a</sup> | 58.0 <sup>b</sup>  | -                   | -                  | -         | -           | -933.2 <sup>c</sup> |
| $N_P$    | DVH      | -89.6              | 14.0               | -                   | -                  | -         | -           | -911.6              |
| $N_{G1}$ | DVH      | -88.2              | 104.2              | -                   | -                  | -         | -           | -853.3              |
| $N_{G2}$ | DVH      | -88.6              | 97.0               | -                   | -                  | -         | -           | -866.5              |
| $S_G$    | DVH      | -152.4             | 49.0               | -                   | -                  | -         | -           | -809.6              |
| DV       | DVP**    | -88.1 <sup>a</sup> | 123.0 <sup>b</sup> | -381.3 <sup>c</sup> | 154.7 <sup>d</sup> | -         | -           | -587.8 <sup>e</sup> |
| $N_P^1$  | DVP      | -89.3              | 103.7              | -448.4              | 7.4                | -         | -           | -572.0              |
| $N_P^2$  | DVP      | -88.7              | 28.5               | -405.4              | 153.3              | -         | -           | -572.0              |
| $N_{G1}$ | DVP      | -88.2              | *                  | -355.6              | 153.2              | -         | -           | -496.9              |
| $N_{G2}$ | DVP      | -87.8              | *                  | -349.1              | 117.1              | -         | -           | -504.2              |
| $S_G$    | DVP      | -150.8             | *                  | -508.6              | 29.6               | -499.9    | 30.5        | -507.2              |

\* The geometries corresponding to this path shown in Figure 6, (a) to (c)

\*\* The geometries corresponding to this path shown in Figure 7, (a) to (e)

<sup>1</sup> Acetylene is chemisorbed on G1 and G2

<sup>2</sup> Acetylene is chemisorbed on G3 and N

**Table 3.** Effect of doping on weakening or strengthening DV reconstruction.  $G_1$ ,  $G_2$ ,  $G_3$  and  $G_4/N/S$  as in Figure 8.

| GBM      | $G_1G_2$ (Å) | $G_3$ ( $G_4/N/S$ ) (Å) |
|----------|--------------|-------------------------|
| DV       | 1.79         | 1.79                    |
| $N_{G1}$ | 1.66         | 1.69                    |
| $N_{G2}$ | 1.70         | 1.71                    |
| $N_P$    | 1.91         | 2.36                    |
| $S_G$    | 1.96         | 1.94                    |

## Free energy calculations:

For the sake of assessing how much energies are affected by entropic contributions, we have calculated free energies for two processes, whose choice was made as follows. Between ethylene and acetylene we chose acetylene since the two additional hydrogens of ethylene make interaction with DV more complicated. Among the two possibilities with acetylene, giving as product either hexagonal rings (Figure 6, DVH) or a hydrogenated Stone-Wales defect (Figure 7, DVP), we chose the latter and, from the doping suggested (Figure 8) we considered  $N_p$ . This is of special importance since the presence of the pyridinic nitrogen significantly facilitates SW formation, and also because the formation of N-doped non-hexagonal rings is of practical interest. Therefore we studied the free energy change: a) from acetylene physisorption on  $N_p$  to acetylene chemisorption through DVP; and b) from acetylene chemisorption leading to the N-doped SW formation.

We have considered Gibbs free energy, defined under constant pressure, and Helmholtz free energy, defined under constant volume. The Gibbs free energy can be calculated by the minimization according to<sup>1</sup>:

$$G(T, p) = \min_V [U(V) + F_{phonon}(V, T) + pV] \quad \text{Equation 3}$$

in which,  $U(V)$  is the total energy corresponding to ground state at an equilibrium volume,  $F_{phonon}(V, T)$  is the crystal vibration energy including zero point energy related to temperature. To calculate the Gibbs free energy of each state (reactants and products) it is essential to calculate the energy corresponding to at least five volume points. For each volume point and for just one state (physisorption, chemisorption or healed DV) of the studied systems i.e. acetylene interacting with  $N_p$ , with 34 atoms, 204 displacements were created using the finite displacement method as implemented in Phonopy software<sup>2</sup>. Therefore, at least 1020 single point energy calculations should be done. Indeed, only for one  $\Delta G$  calculation using quasi-harmonic approximation (QHA) phonon calculations, at least 2040 single point energy calculations are required. According to Table 1 and Table 2, in this study 13 reactions, including 34 states have been considered. Therefore, to calculate  $\Delta G$ s for all reaction steps at least 34680 single point calculations would be required, which is not computationally affordable and that is why only two free energy calculations were selected, as stated above.

Hence, the free energy changes from acetylene physisorption on  $N_p$  to acetylene chemisorption through DVP and the subsequent N-doped SW formation were studied using the finite displacement method indicated above. All variables were selected similar to the reported electronic structure calculations using Quantum Espresso and the free energy calculations for fully relaxed geometries corresponding to numbers 1, 3 and 5 of Table S6 were conducted. We approximate the Gibbs free energy as the sum of total energy and vibrational free energy by estimating  $pV$  and  $TS^{conf}$  to be negligible from Equation 4 as follows<sup>3</sup>:

$$G = E + F^{vib} - TS^{conf} + pV \approx E + F^{vib} \quad (\text{Electron and phonon contribution}) \quad \text{Equation 4}$$

Considering the possibility to estimate the electron contribution of free energy at elevated temperatures from calculated energy at 0 K using Quantum Espresso,  $\Delta H(0K) - T\Delta S$  and  $\Delta H(0K) + \Delta F^{vib}$  versus temperature were calculated as follows.

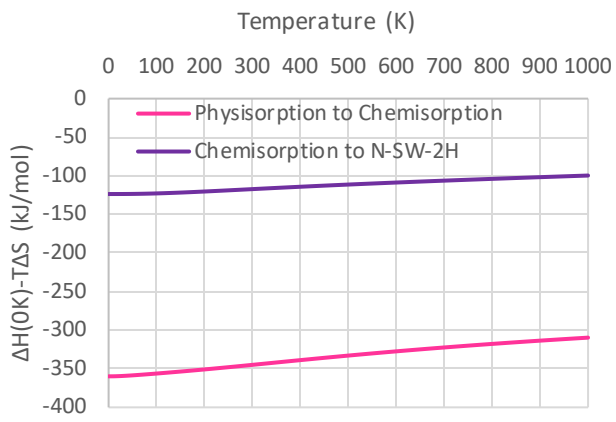

$\Delta H(0K)-T\Delta S$  versus T plot

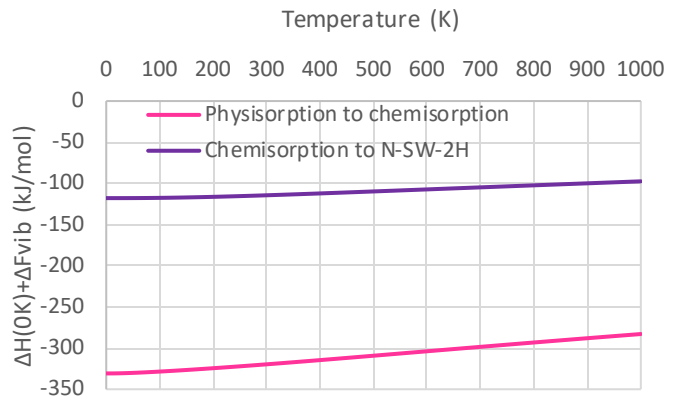

$\Delta H(0K)+\Delta F^{vib}$  versus T plot

- [1] Y.-L. Jiang and X.-B. Yang, Solid State Commun. 2021, **337**, 114452.
- [2] A. Togo and I. Tanaka, Scripta Materialia, 2015, **108**, 1-5.
- [3] M. Geng and H. Jónsson, J. Phys. Chem. C 2018, **123**, 464-472.
